# Supplementary material for: Role of phosphorus concentration and the nitrogen to phosphate ratio in the synergistic stimulation of alkaline phosphatase activity in Laizhou Bay, China, coastal waters
Source: Copernicus journal article supplement (doi:10.5194/egusphere-2025-4047), 2025-09-19
Supplement: Supplementary file 1 [file egusphere-2025-4047-supplement.pdf]

# **Role of phosphorus concentration and the nitrogen to phosphate ratio in the synergistic stimulation of alkaline phosphatase activity in Laizhou Bay, China, coastal waters**

## **1. Tables**

Table S1 Initial nutrient status in enclosed culture experiments

| Experimental condition | DIN ( $\mu\text{mol}\cdot\text{L}^{-1}$ ) | PO <sub>4</sub> -P ( $\mu\text{mol}\cdot\text{L}^{-1}$ ) | DIN : PO <sub>4</sub> -P |
|------------------------|-------------------------------------------|----------------------------------------------------------|--------------------------|
| Control group (CG)     | 1.90                                      | 0.04                                                     | 55                       |
| Treatment group (TG)   | 50.01                                     | 1.78                                                     | 28                       |

Table S2 Light, temperature and rainfall during culture experiment

| Date      | Culture time | Light intensity   | Temperature        | Weather                      | Precipitation |
|-----------|--------------|-------------------|--------------------|------------------------------|---------------|
|           | d            | $\times 10^3$ lux | $^{\circ}\text{C}$ |                              | mm            |
| 2021.7.23 | 0            | 135               |                    | Cloudy to overcast           |               |
| 2021.7.24 | 1            | 140               |                    | Cloudy to sunny              |               |
| 2021.7.25 | 2            | 110               | 31.0               | Overcast to clear            |               |
| 2021.7.26 | 3            | 103               | 31.6               | Cloudy to overcast           |               |
| 2021.7.27 | 4            | 75                | 30.8               | Cloudy to overcast           |               |
| 2021.7.28 | 5            | 50                | 30.8               | Cloudy                       |               |
| 2021.7.29 | 6            | 50                | 29.8               | 9:00~17:00<br>Heavy rainfall | 15.41         |

|           |    |     |      |                               |       |
|-----------|----|-----|------|-------------------------------|-------|
| 2021.7.30 | 7  | 33  | 28.2 | Cloudy to light<br>rain       | 2.27  |
| 2021.7.31 | 8  | 137 | 29.6 | Sunny to thundery<br>shower   | 24.93 |
| 2021.8.2  | 10 | 130 | 28.8 | Sunny                         |       |
| 2021.8.4  | 12 | 84  | 30.0 | Cloudy                        |       |
| 2021.8.5  | 13 | 50  |      | 15:00~17:00<br>Heavy rainfall | 21.78 |
| 2021.8.6  | 14 | 80  | 29.0 | Sunny to cloudy               |       |
| 2021.8.8  | 15 | 120 | 30.4 | Sunny                         |       |
| 2021.8.11 | 16 | 134 |      | Cloudy to overcast            |       |
| 2021.8.14 | 19 | 79  |      | Sunny                         |       |
| 2021.8.16 | 22 | 121 |      | Sunny                         |       |
| 2021.8.18 | 26 | 138 | 29.8 | Sunny to cloudy               |       |
| 2021.8.21 | 29 | 135 | 28.6 | Sunny                         |       |

---

## 2. Figures

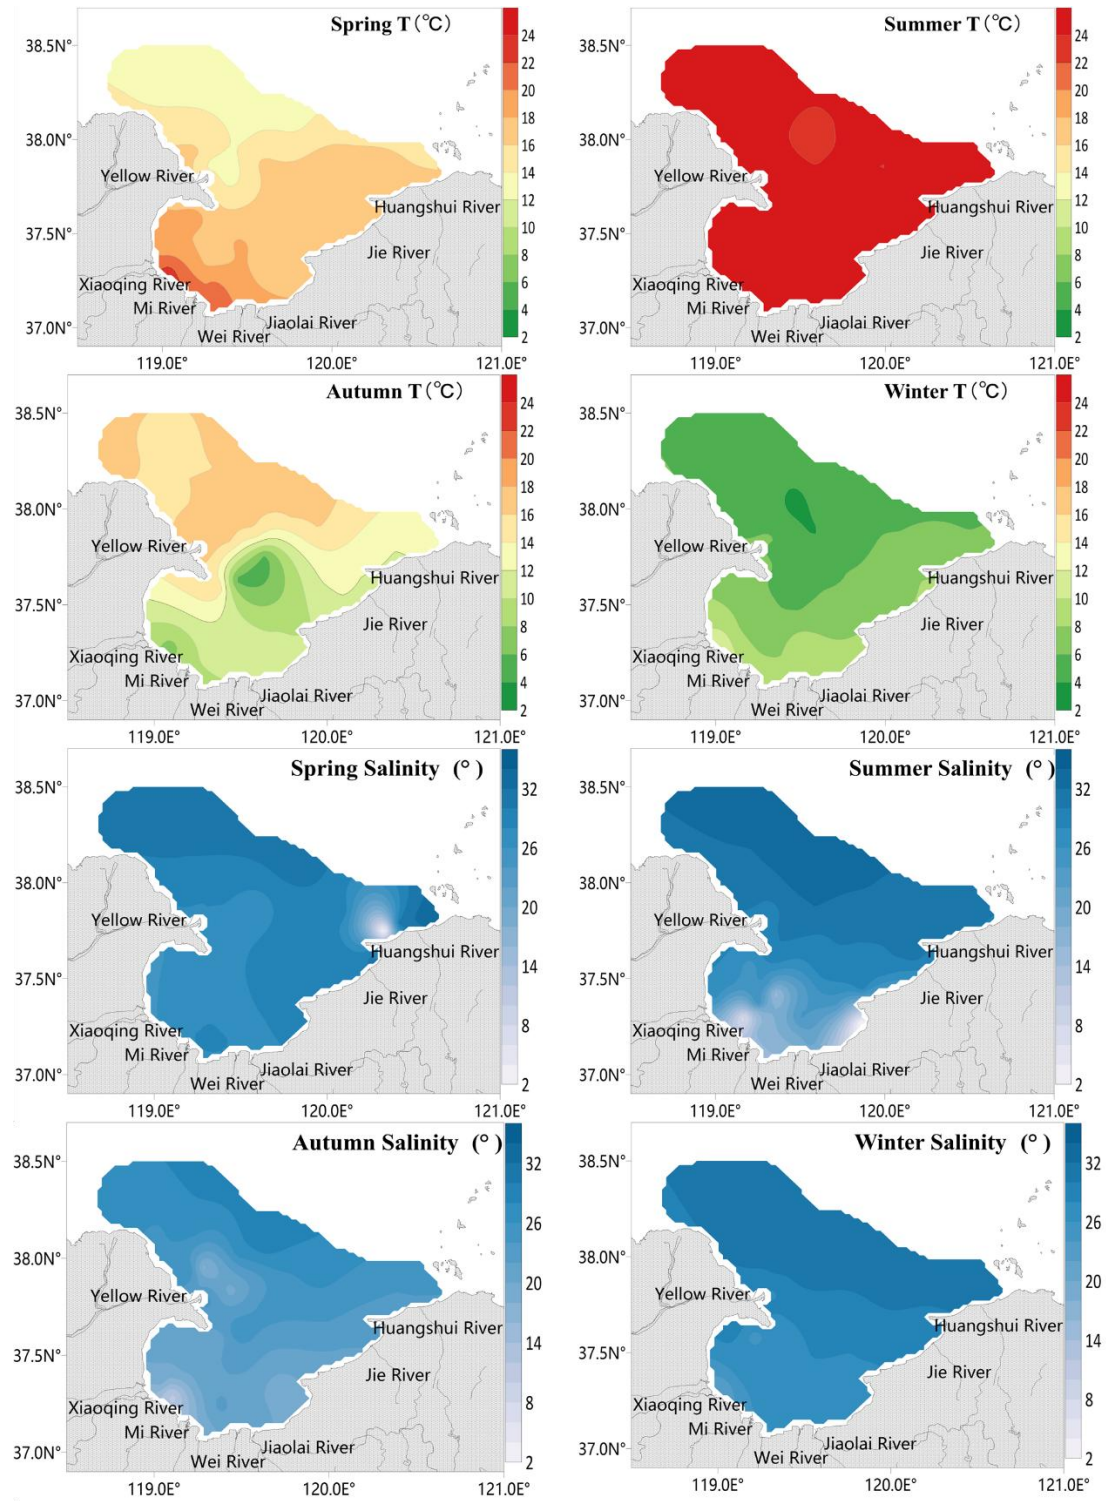

Figure S1 Seasonal changes of surface seawater temperature and salinity in Laizhou Bay.

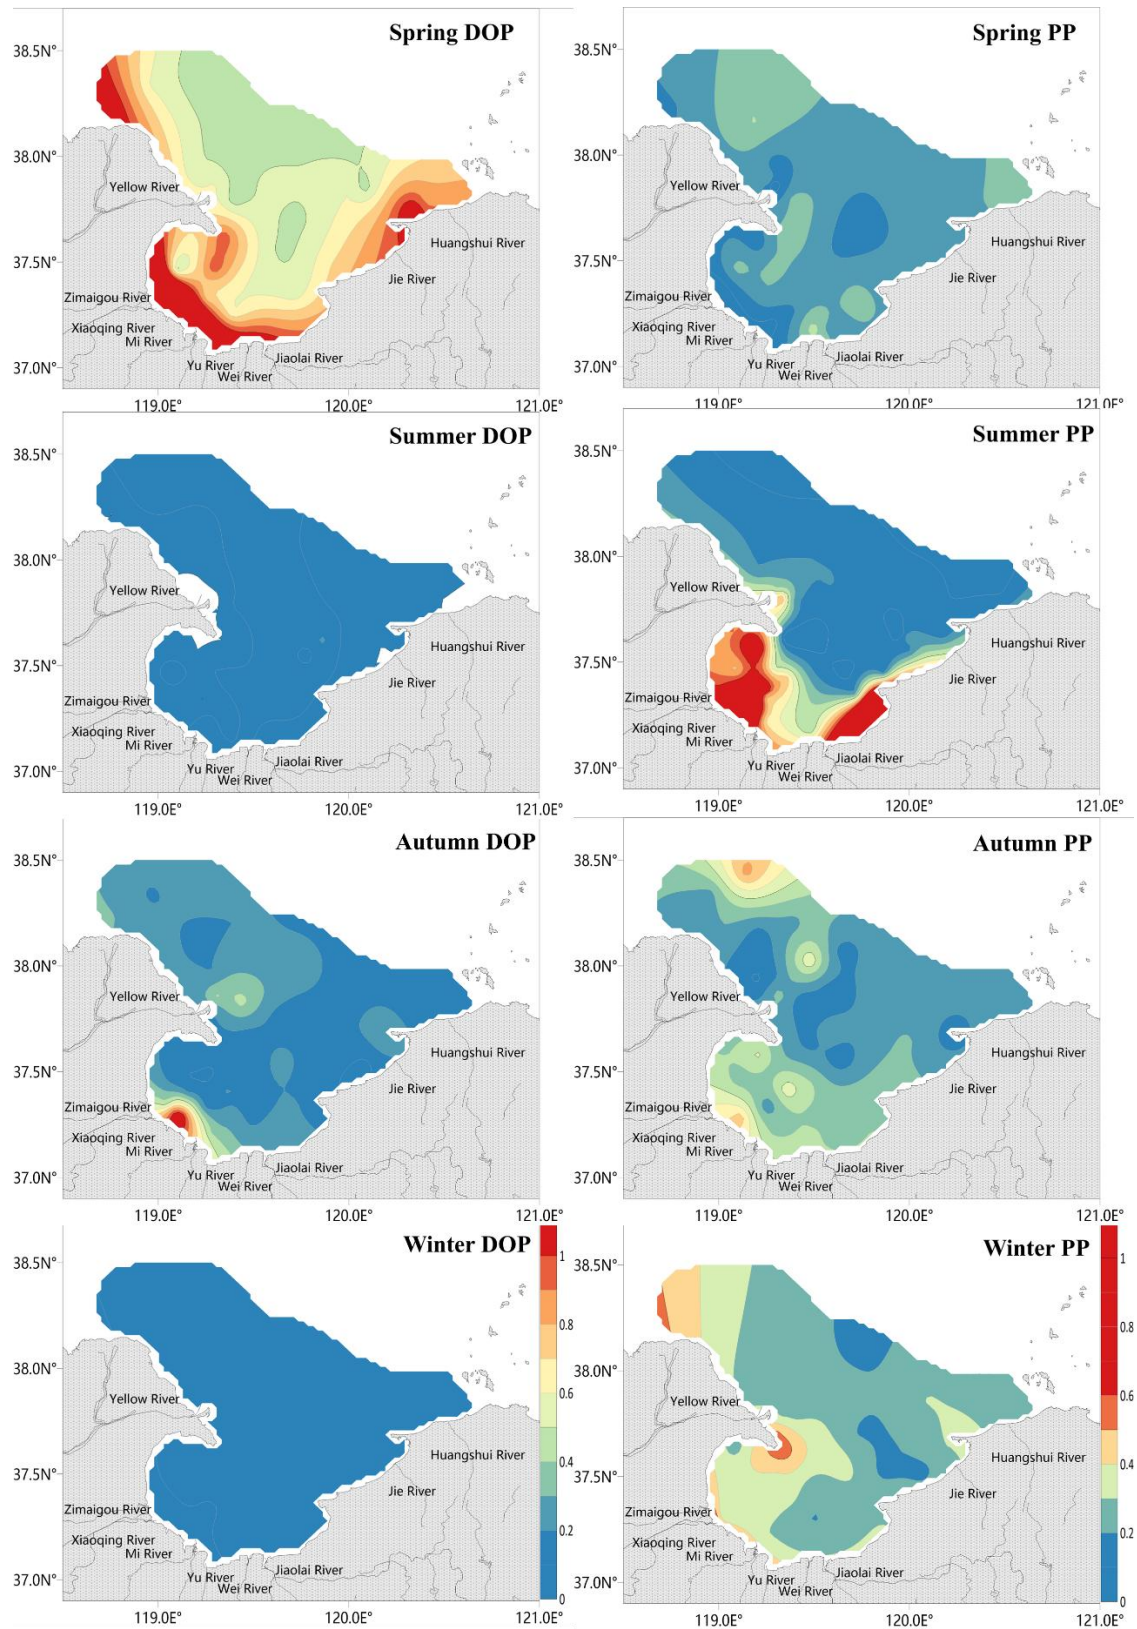

Figure S2 Seasonal changes of surface seawater dissolved inorganic nitrogen in Laizhou Bay.



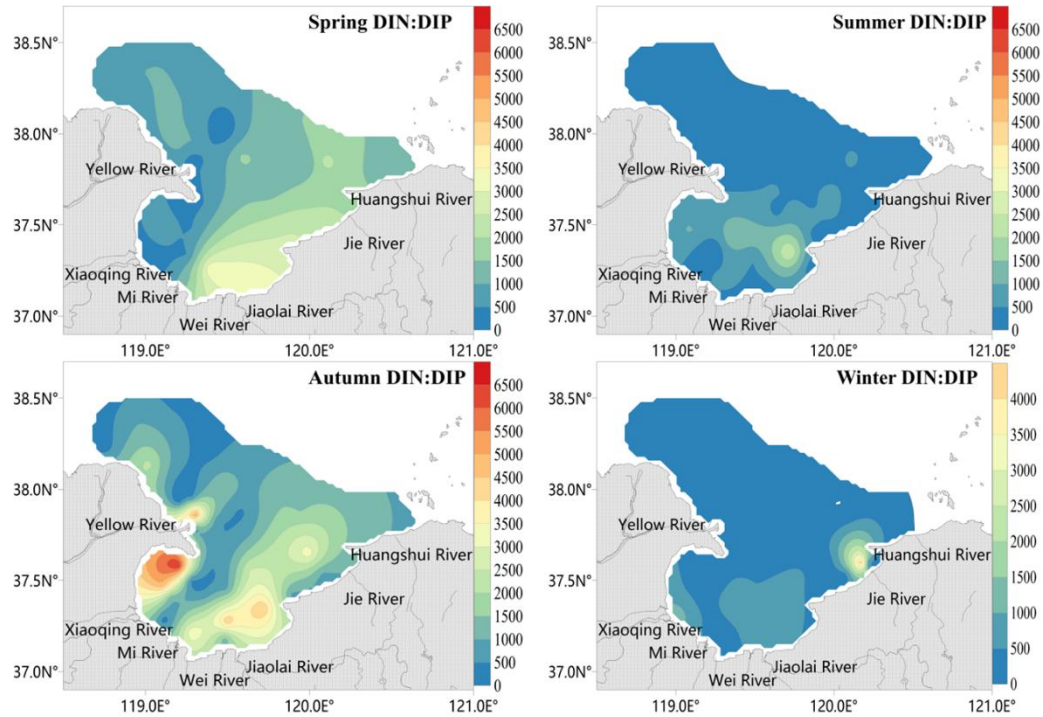

Figure S3 Seasonal changes of surface seawater dissolved inorganic nitrogen and phosphorus in Laizhou Bay.

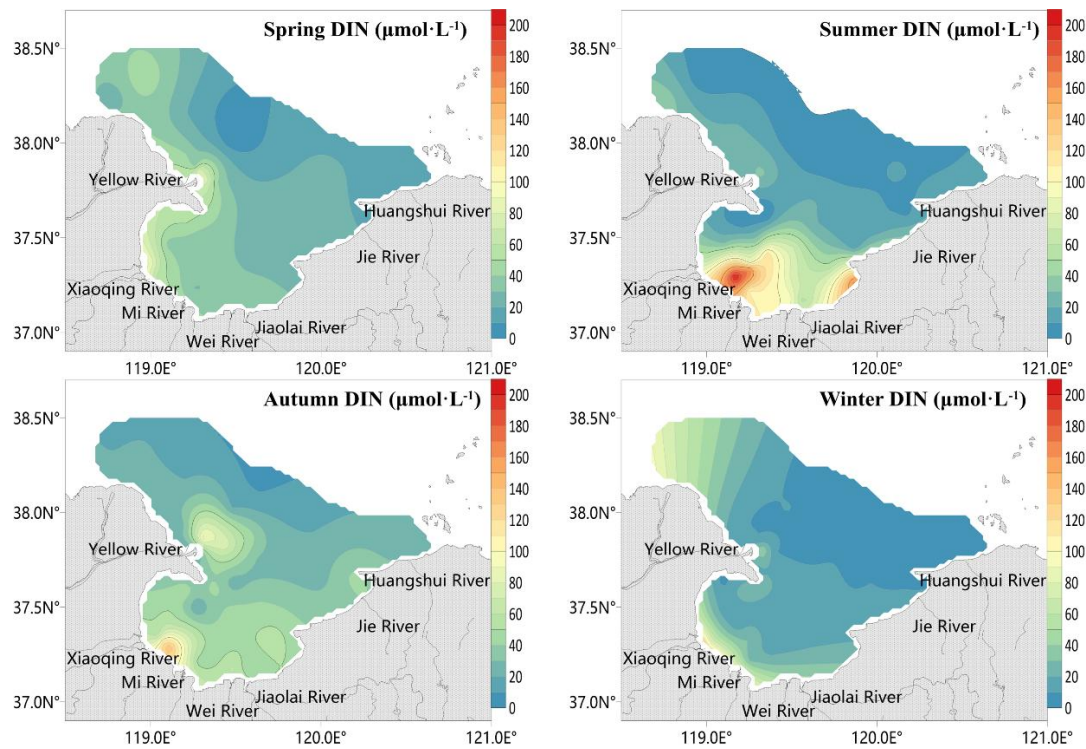

Figure S4 Seasonal changes of surface seawater dissolved inorganic nitrogen in Laizhou Bay.

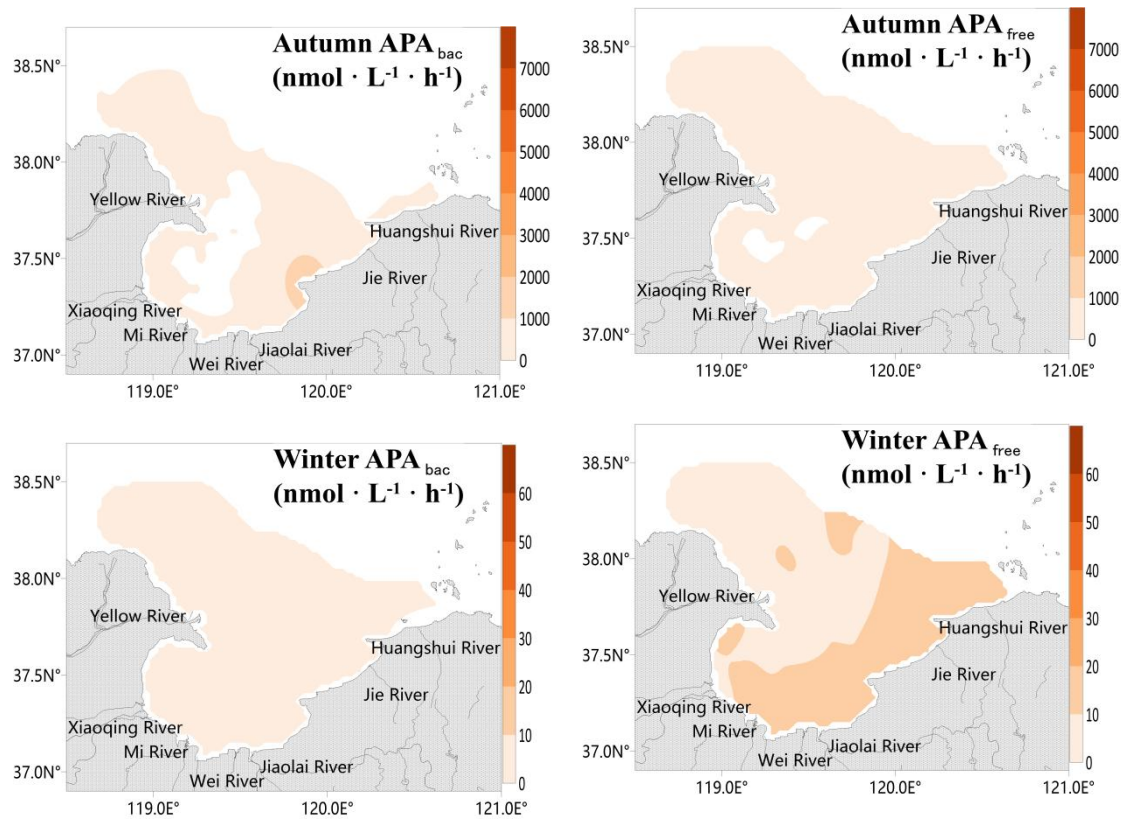

Figure S5 Changes of surface seawater APA<sub>bac</sub> and APA<sub>free</sub> in Laizhou Bay in autumn and winter 2021.

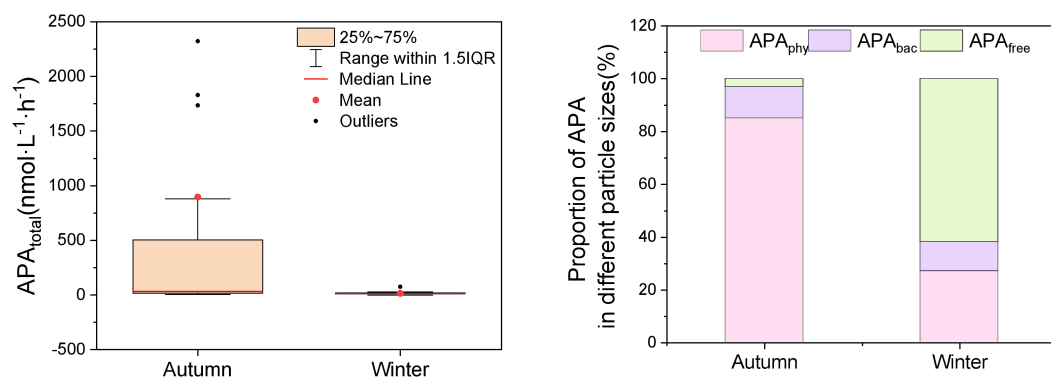

Figure S6 Proportion of different APA sizes in Laizhou Bay in autumn and winter 2021.

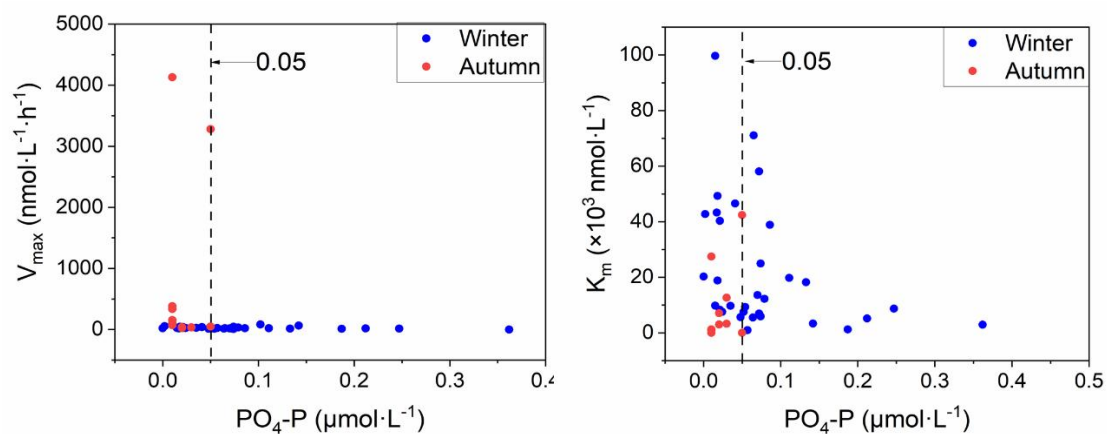

Figure S7 Proportion of different APA sizes in Laizhou Bay in autumn and winter 2021.

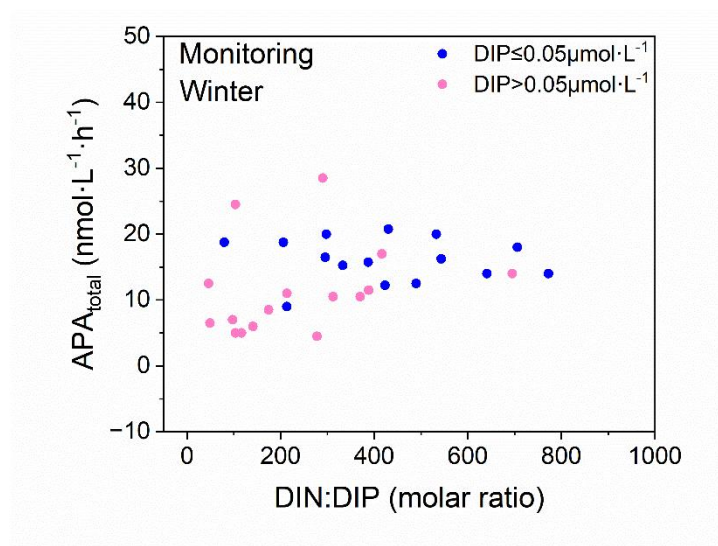

Figure S8 Correlation between alkaline phosphatase activity (APA) and DIN/DIP.
